# Cell adhesion to laminin 1 or 5 induces isoform-specific clustering of integrins and other focal adhesion components

Dagmar Dogic, Patricia Rousselle and Monique Aumailley\*

Institut de Biologie et Chimie des Protéines, CNRS UPR 412, Lyon, France

\*Author for correspondence at present address: Institute for Biochemistry, Medical Faculty, University of Cologne, Cologne, Germany (e-mail: aumailley@uni-koeln.de)

Accepted 6 January 1998; published on WWW 23 February 1998

## SUMMARY

Laminin 1 ( $\alpha1\beta1\gamma1$ ) and laminin 5 ( $\alpha3\beta3\gamma2$ ) induce cell adhesion with different involvement of integrins: both are ligands for the  $\alpha6\beta1$  integrin, while  $\alpha3\beta1$  integrin has affinity for laminin 5 only. These two laminin isoforms therefore provide good models to investigate whether  $\alpha3\beta1$  and  $\alpha6\beta1$  integrins play different roles in signal transduction and in focal adhesion formation. Laminin 1 or 5 induced adhesion of normal human skin fibroblasts to a similar extent but promoted different overall cell shapes. On laminin 1 the fibroblasts formed mainly filopodia-like structures, while on laminin 5 they developed lamellipodias. Staining of fibrillar actin with fluorescein-phalloidin revealed a similar organisation of the actin cytoskeleton on both substrates. However, integrin subunits and several cytoskeletal linker proteins, including vinculin, talin, and paxillin, showed an isoform-specific arrangement into focal adhesions. On laminin 1 they were recruited into thick and short aggregates localized at the termini of actin stress fibers, while on laminin 5 they appeared as dots or streaks clustered on a long portion of actin microfilaments.

To test whether the differing affinity of laminin 1 or 5 for  $\alpha3\beta1$  integrin would explain the formation of morphologically different focal adhesions, cells were seeded on laminin 1 under conditions in which  $\alpha3\beta1$  integrins were occupied by a function-blocking antibody. This resulted in the formation of focal adhesions similar to that observed on laminin 5, where the integrin is occupied by its natural ligand. These results provide the first evidence for a cross-talk between  $\alpha3\beta1$  and  $\alpha6\beta1$  integrins and indicate that occupancy of  $\alpha3\beta1$  integrins results in a trans-dominant regulation of  $\alpha6\beta1$  integrin clustering and of focal adhesions. It suggests that recruitment of integrins and cytoskeletal linker proteins are laminin isoform-specific and that tissue specific expression of laminin isoforms might modulate cell behavior by the activation of distinct sets of integrins and by the induction of distinct molecular assemblies within the cell adhesion signaling complexes.

Key words: Laminin, Integrin, Focal adhesion

## INTRODUCTION

Laminins form a family of heterotrimeric molecules ubiquitous of basement membranes (Timpl and Brown, 1994; Aumailley and Krieg, 1996). They are formed by the association of three different gene products, the  $\alpha$ ,  $\beta$ , and  $\gamma$  chains (for nomenclature see Burgeson et al., 1994). Up to now 11 laminin isoforms (laminin 1 to 11) resulting from the heterotrimeric combinations of five  $\alpha$ , three  $\beta$ , and two  $\gamma$  chains have been identified (for references see Miner et al., 1997) and additional chains may exist. The expression of laminin chains is spatio-temporally regulated (Ekblom et al., 1990; Lentz et al., 1997; Miner et al., 1997; Tiger et al., 1997) suggesting that different isoforms might have distinct roles to fulfill. One major function of laminin is to control cell behavior by interacting with integrins (Aumailley et al., 1996), transmembrane receptors involved in the bidirectional transfer of signals between the extracellular matrix and the cell interior (Hynes, 1992; Clark and Brugge, 1995). Ligation of integrins to extracellular targets leads to a series of events including clustering of the receptors, recruitment of focal-

adhesion linker proteins, actin polymerization, and a phosphorylation cascade (Burrige et al., 1988; Luna and Hitt, 1992; Juliano and Haskill, 1993; Sastry and Horwitz, 1993; Clark and Brugge, 1995).

Detailed studies of laminin 1 ( $\alpha1\beta1\gamma1$ ) isolated from the Engelbreth-Holm-Swarm tumor (EHS) have shown that the native molecule contains two major integrin binding domains (Aumailley et al., 1996). One is located on the short arms of the native molecule and is the target for  $\alpha1\beta1$  or  $\alpha2\beta1$  integrins (Hall et al., 1990; Goodman et al., 1991; Pfaff et al., 1994; Colognato-Pyke et al., 1995). The other, which is more strongly conformation dependent, has been mapped to a proteolytic fragment of laminin 1, fragment E8, encompassing the end of the long arm and the three first carboxy-terminal G domains (Aumailley et al., 1996; Goodman et al., 1987; Deutzmann et al., 1990). Fragment 8 as well as native laminin 1 are ligands for cells expressing  $\alpha6\beta1$  or for a restricted number of cell types expressing  $\alpha7\beta1$  integrins (Aumailley et al., 1996; Sonnenberg et al., 1990a; Hall et al., 1990; Kramer et al., 1991; von der Mark et al., 1991). In addition, the most carboxy-terminal region of laminin 1 has affinity for  $\alpha$ -

dystroglycan, a component of the dystrophin-glycoprotein complex (Henry and Campbell, 1996).

Investigations of laminin 5 ( $\alpha 3\beta 3\gamma 2$ ) have indicated that all the cell binding sites are conformation-dependent (Rousselle et al., 1995) and that two integrins only,  $\alpha 3\beta 1$  or  $\alpha 6\beta 1$ , mediate initial cell adhesion to laminin 5 (Delwel et al., 1993, 1994; Rousselle and Aumailley, 1994). Although it might not be involved in the initial step of cell adhesion to laminins (Carter et al., 1990), another integrin,  $\alpha 6\beta 4$ , is particularly important for stable, *in vivo* anchorage of basal keratinocytes which bind only to basement membranes containing epithelial laminins (Vidal et al., 1995; van der Neut et al., 1996; Niessen et al., 1996; Dowling et al., 1996). Mainly due to difficulties in the isolation of the proteins, information on other laminin isoforms is more limited. Laminin 2 ( $\alpha 2\beta 1\gamma 1$ ), 4 ( $\alpha 2\beta 2\gamma 1$ ), and partially characterized isoforms isolated from bovine kidney also induce cell adhesion (Brown et al., 1994; Forsberg et al., 1994), and interact with cells specifically transfected to express  $\alpha 3\beta 1$  or  $\alpha 6\beta 1$  integrins (Delwel et al., 1993, 1994). The contribution of these various integrins in mediating cell adhesion to the different laminin isoforms and in transducing laminin signals might not be identical.

Integrins are thought to transduce signals from the extracellular matrix to the cell interior at focal adhesion sites (Burrige et al., 1988; Juliano and Haskill, 1993; Clark and Brugge, 1995), but all integrins are not necessarily present in focal contacts (Hynes, 1992). These structures are multimolecular complexes formed by the association of a given extracellular matrix ligand, its receptors, and intracellular cytoskeletal linker proteins. They therefore provide a physical link between the exterior and the inside of the cell suitable for the transmission of signals elicited by the extracellular matrix. However, in spite of the different extracellular matrix ligands and the many integrins playing a role in cellular interaction and signal transduction, no ligand- or integrin-specific focal adhesion complexes have been described. Since laminins 1 and 5 are ligands for different sets of integrins, they provide a model to address this question. In particular,  $\alpha 3\beta 1$  integrins interact with laminin 5 only and direct binding to laminin 1 could not be demonstrated (Sonnenberg et al., 1991; Delwel et al., 1993, 1994; Rousselle and Aumailley, 1994). We have now used laminin 1 or 5 substrates to study the role of  $\alpha 3\beta 1$  and  $\alpha 6\beta 1$  integrins in the formation of focal adhesion complexes. Our choice of primary human skin fibroblasts was based on the fact that: (1) they are normal cells, (2) they express, among others, the  $\alpha 3$ ,  $\alpha 6$ , and  $\beta 1$  integrin subunits, and (3) they do not express the  $\beta 4$  integrin subunit, so that  $\alpha 6\beta 4$  dimers are absent (Sonnenberg et al., 1990b; P. Rousselle, unpublished results). So, even not necessarily physiological in the context of adhesion to laminins, normal human skin fibroblasts represent a simplified and well-suitable model to study focal adhesion formation under the control of  $\alpha 3\beta 1$  and  $\alpha 6\beta 1$  integrins. Immunofluorescence analysis of several focal adhesion-associated elements during cell attachment to laminin 1 or 5 showed the formation of substrate-specific and morphologically different focal adhesions. In particular, laminin 1 induced clustering of integrins and cytoskeletal-associated molecules into thick, short aggregates, while on laminin 5 these elements were clustered into thin, discontinuous-line structures. Furthermore we could demonstrate that the pattern of focal adhesions is dependent on

the occupancy of  $\alpha 3\beta 1$  integrins by either its extracellular matrix ligand (laminin 5) or antibodies against the integrin  $\alpha 3$  subunit. Our results indicate that the supramolecular assembly of focal adhesion structures is laminin isoform-specific and dictated by the nature of the integrins present in the complexes.

## MATERIALS AND METHODS

### Cell cultures

Human skin fibroblast cultures were initiated by explant outgrowth from the dermis of neonatal foreskin as previously described (Aumailley et al., 1982). Established lines of human ovarian carcinoma (OVCAR-4), or mammary epithelial (HBL100) cells have been previously described (Aumailley et al., 1989; Rousselle and Aumailley, 1994). The cells were subcultured and maintained in Dulbecco's modified Eagle's medium (DMEM) in the presence of 10% fetal calf serum, 200 mM glutamine and a cocktail of antibiotics. Cells were harvested for subculturing or for experiments using 0.05% trypsin and 0.02% EDTA in phosphate-buffered saline, pH 7.4 (PBS). Normal human skin fibroblasts were used between passages 3 and 10. Cell culture reagents were from Seromed-Biochrom (Polylabo, Strasbourg, France) and plastic ware from Falcon (Dutscher, Brumath, France).

### Cell adhesion substrates and anti-integrin antibodies

Laminin-nidogen complex (the laminin 1 substrate) purified from the EHS tumor of the mouse and the elastase digestion-derived fragment 8 (Paulsson et al., 1987) were kindly provided by Dr R. Timpl (Max-Planck Institute, Martinsried, Germany). Laminin 5 was purified from the culture medium of human SCC25 cells by affinity chromatography on laminin  $\alpha 3$  chain-specific mAb BM165 as previously described (Rousselle et al., 1991; Rousselle and Aumailley, 1994). Human collagen IV from placenta was a gift from Dr K. Kühn (Max-Planck Institute, Martinsried, Germany). Protein concentrations were determined by the BCA assay (Pierce, Rockford, IL, USA). All substrates were kept frozen at  $-20^{\circ}\text{C}$ .

The following mAbs against integrin subunits were used: P4C10 against  $\beta 1$ , P1E6 against  $\alpha 2$ , and P1B5 against  $\alpha 3$ , all from Telios (distributed through Gibco BRL, Cergy Pontoise, France), K20 against  $\beta 1$  (Immunotech, Marseille, France) and GoH3 against  $\alpha 6$  (kindly given by Dr A. Sonnenberg, The National Cancer Institute, Amsterdam, The Netherlands, or from Cappel, distributed by Speci, Sainte Foy Lès Lyon, France). Other mAbs included F-VII against human vinculin (a gift from Dr M. Glukhova, CNRS UMR144, Paris, France), 8d4 against talin (Sigma Immunochemicals, St Quentin-Fallavier, France), and mAb165 against paxillin (a generous gift from Dr C. Turner, State University of New York, Syracuse, NY, USA).

### Cell adhesion and inhibition assays

Multiwell tissue culture plates (96-well, Costar, Dutscher, France) were coated with serial dilutions of laminin substrates (0-20  $\mu\text{g}/\text{ml}$ , 100  $\mu\text{l}/\text{well}$ ) by overnight adsorption at  $4^{\circ}\text{C}$ . After saturation of the wells with 1% bovine serum albumin (BSA, fraction V, Sigma Chimie) the plates were immediately used for cell adhesion assays in serum-free medium as detailed previously (Aumailley et al., 1989). The extent of adhesion was determined after fixation of the adherent cells with 1% glutaraldehyde in PBS, by staining with 0.1% Crystal Violet, and colour reading at 570 nm with an ELISA reader (MR5000 Dynatech, Guernsey, Channel Islands). A blank value corresponding to BSA coated wells ( $\leq 5\%$  of maximal cell adhesion) was automatically subtracted. Adherent cells were photographed using a phase contrast microscope equipped with camera (Olympus, OSI, Paris, France). For adhesion inhibition experiments with anti-integrin antibodies, cells in suspension were mixed with dilutions of antibody

prior to plating onto the coated wells. For all experiments, each assay point was derived in triplicate.

### Immunofluorescence staining of focal adhesions

Round glass coverslips deposited on the bottom of 24-well plates (Costar, Dutscher) were coated with laminin 1, fragment E8, laminin 5, collagen IV, or fibronectin (2-10  $\mu\text{g/ml}$ ), at 4°C overnight. Cell adhesion to the coats was carried out as described above for 60 minutes. In some experiments cell adhesion to the coated coverslips was performed in the presence of anti-integrin antibodies used at function-blocking concentrations (P1B5, 1:400; P1E6, 1:2,000). Adherent cells were fixed with 2% paraformaldehyde in PBS for 15 minutes, permeabilized with 0.2% Triton X-100 for 1 minute, rinsed several times with PBS, and incubated for 45 minutes with the first antibody. Cy3-conjugated second antibodies against mouse or rat immunoglobulins (Jackson, distributed through Immunotech) were applied together with fluorescein isothiocyanate-phalloidin (Sigma Immunochemicals) for another 45 minutes. The glass coverslips were mounted onto slides in 9:1 (v/v) glycerol/PBS and the cells were observed by epifluorescence with an Universal or an Axiophot Zeiss microscope. Photomicrographs were taken on Kodak T-Max 400 film.

## RESULTS

Substrate concentration-dependent curves showed that within 30 minutes laminin 1 or 5 induce adhesion of normal human skin fibroblasts to the same extent (Fig. 1A) followed by distinct spreading of the cells. To better visualize cell morphology, fibroblasts adhering to laminin coated glass coverslips were stained with fluorescein isothiocyanate-phalloidin at different time points (15, 30, 60 and 120 minutes) after seeding. On both substrates the cell morphology progressively changed from round, at 15 minutes, to fully

spread, at 60 minutes. At this time point, staining of fibrillar actin revealed a well developed network, with many actin cables running longitudinally across the cell body (Fig. 1B). However, the overall cell morphology was different, with irregular cell margins, numerous spikes, and filopodia-like elongated processes on laminin 1, while on laminin 5 large lamellae-like areas developed giving the cell margins a regular and smooth appearance (Fig. 1B). This difference was observed after shorter (30 minutes) or longer (120 minutes)

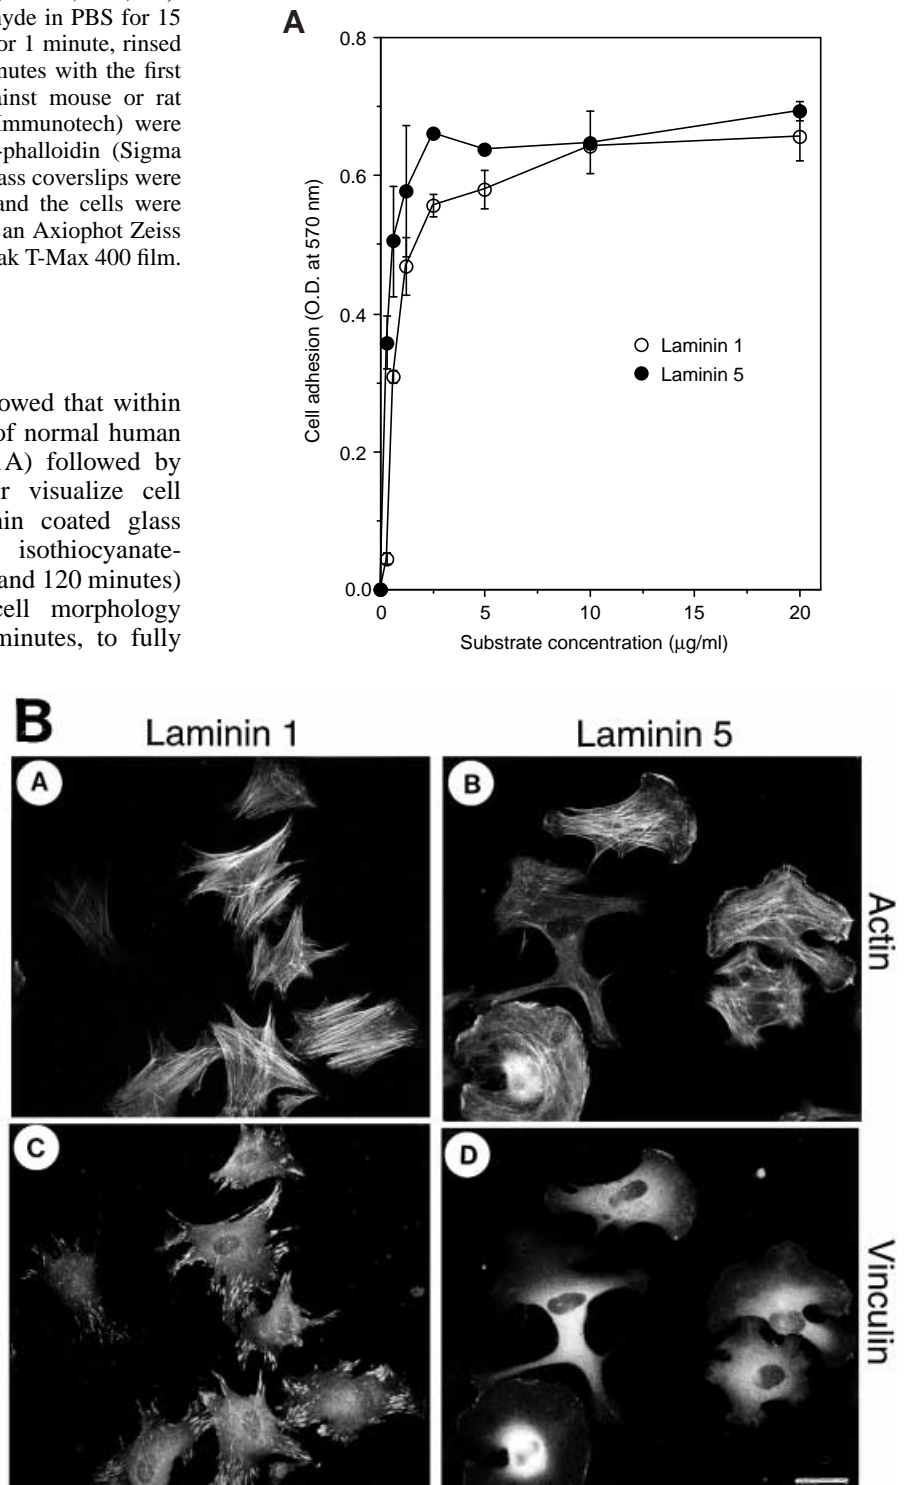

**Fig. 1.** Dose-dependent adhesion and spreading of normal human skin fibroblasts on laminin 1 or 5. (A) Multiwell plates were coated with different concentrations of laminin 1 (○) or 5 (●) as indicated on the figure. Cell adhesion was measured after 30 minutes using a colorimetric reaction as described in Materials and Methods. Each point represents the average of triplicate wells. (B) Glass coverslips were coated with laminin 1 or 5. After 60 minutes of adhesion adherent fibroblasts were double-stained with fluorescein-phalloidin (A,B) and with mAb against vinculin followed by Cy3-conjugated second antibody (C,D). The specimen were observed with a  $\times 40$  objective. Bar, 15  $\mu\text{m}$ .

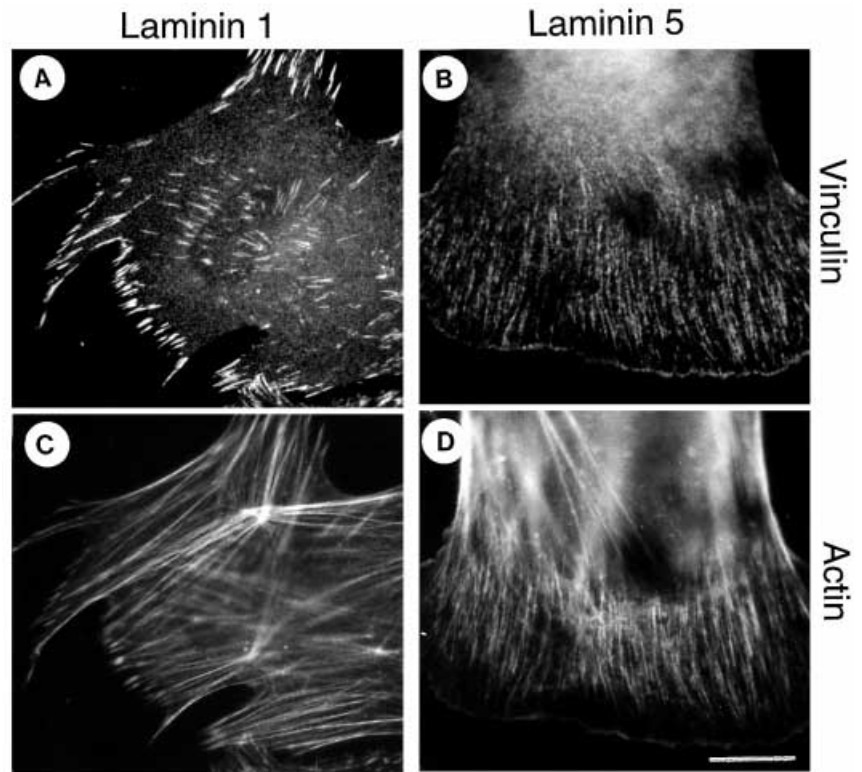

**Fig. 2.** Detailed morphology of focal adhesions formed by normal human skin fibroblasts on laminin 1 or laminin 5 substrates. Adherent fibroblasts were processed for visualization of vinculin (A,B) or fibrillar actin (C,D) as described in Fig. 1B. The specimens were observed under oil immersion with a  $\times 100$  objective. Bar, 5  $\mu\text{m}$ .

incubation time on the substrates (not shown). Double-labeling with antibodies against vinculin indicated that for cells on laminin 1 vinculin aggregates were segregated into thick patches, mostly at the ends of the actin microfilaments (Fig. 1B and Fig. 2). In contrast, on laminin 5 vinculin clustering was barely seen at low magnification (Fig. 1B). At higher magnification, vinculin aggregates appeared as tiny streaks aligned with a long portion of actin microfilaments, much different to those in cells adhering to laminin 1 (Fig. 2). Immunofluorescence labeling of two other focal adhesion-associated components, talin or paxillin, showed that they were organized similarly to vinculin according to a substrate-specific pattern (Fig. 3). In order to assess whether the substrate-characteristic pattern of staining was specific for normal human skin fibroblasts, two human cell lines, ovarian carcinoma (OVCAR-4) and mammary epithelial (HBL100) cells, were processed under the same conditions. Observation revealed the same difference in the stainings of cells adhering to laminin 1 or 5 (Fig. 4). Moreover, clustering of the  $\beta 1$  and  $\alpha 6$  integrin subunits (Fig. 5) was similar to that observed for cytoskeletal linker proteins. On laminin 1, indirect immunofluorescence labeling of integrin subunits decorated thick and well individualized short patches (Fig. 5) which colocalized with the termini of actin stress fibers (not shown). In contrast, on laminin 5 the two integrin subunits were organized into tiny aligned dots (Fig. 5) associated with a long portion of actin microfilaments (not shown). A similar discontinuous line-pattern was seen when cells plated on laminin 5 were stained with antibodies against the  $\alpha 3$  integrin subunits, while on laminin 1 such staining resulted in a more diffuse labeling and distinct decoration of focal adhesions was infrequently observed (Fig. 5).

For a wide range of normal cells or established cell lines it

has been shown that the  $\alpha 6\beta 1$  integrin is the major receptor for laminin 1 (Aumailley et al., 1996; Sonnenberg et al., 1990a; Deutzmann et al., 1990) and that  $\alpha 3\beta 1$  integrin does not bind to laminin 1 (Sonnenberg et al., 1991; Delwel et al., 1994). In contrast, the  $\alpha 3\beta 1$  integrin is the major receptor for laminin 5 (Carter et al., 1991; Rousselle and Aumailley, 1994; Delwel et al., 1994). By cell adhesion-inhibition studies with function blocking antibodies, we therefore assessed if that was also true for normal human skin fibroblasts. Incubating the cells with antibodies directed against the  $\beta 1$  integrin subunit resulted in a complete inhibition of cell adhesion to laminin 1 or 5 (Fig. 6) indicating that, in the model used here, fibroblast adhesive interactions with both substrates are entirely mediated by integrins of the  $\beta 1$  family. Antibodies directed against the  $\alpha 6$  integrin subunit decreased fibroblast adhesion to laminin 1 but not to laminin 5, while antibodies against the  $\alpha 3$  integrin subunit had no effect on cell adhesion to laminin 1 but decreased cell adhesion to laminin 5. When the cells were incubated with a combination of antibodies against the  $\alpha 3$  and the  $\alpha 6$  integrin subunits, adhesion to laminin 5 was totally prevented (Fig. 6) as we have previously reported for other cells, including the OVCAR-4 or HBL100 lines (Rousselle and Aumailley, 1994). In the case of laminin 1, combining the antibodies did not result in a more pronounced inhibition of cell adhesion than that observed with antibodies against the  $\alpha 6$  integrin subunit alone (Fig. 6) and the residual adhesion was attributed to  $\alpha 1\beta 1$  and  $\alpha 2\beta 1$  integrin binding to the short arms of laminin 1 (not shown) in agreement with previous results (Languino et al., 1989; Goodman et al., 1991; Pfaff et al., 1994; Colognato-Pyke et al., 1995).

The fact that  $\alpha 3\beta 1$  integrin contributes to cell adhesion to laminin 5 but not to laminin 1 suggested either that occupancy of this integrin or the presence of additional integrin binding

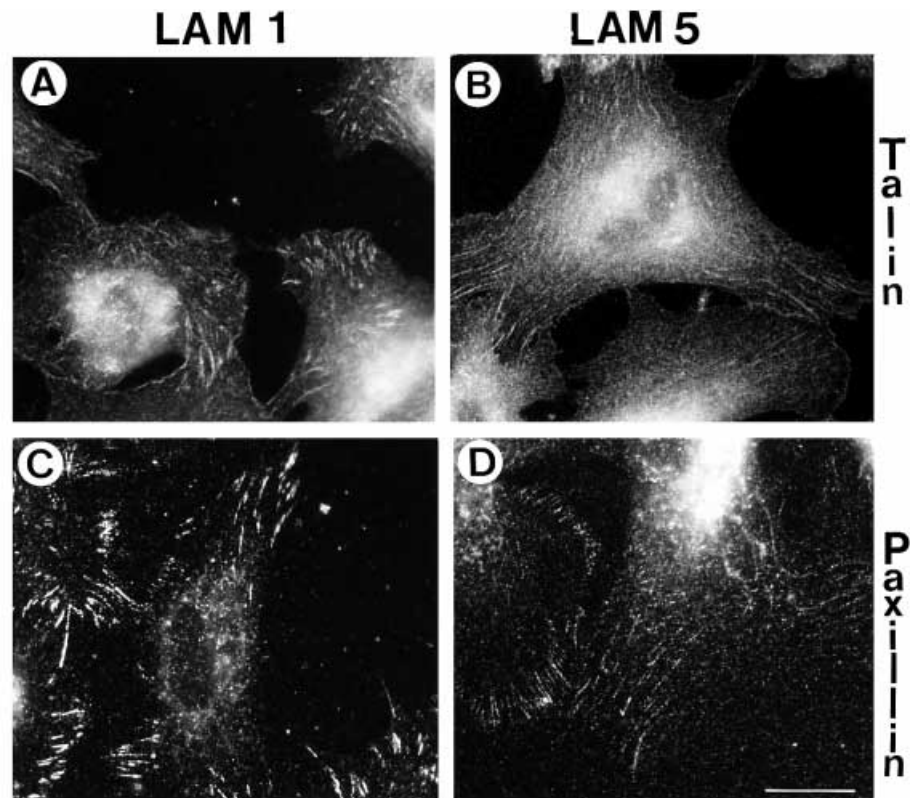

**Fig. 3.** Indirect immunofluorescence staining of talin or paxillin in normal human skin fibroblasts on laminin 1 or 5. Normal human skin fibroblasts were seeded on laminin 1 (A,C) or 5 (B,D) coats. After 60 minutes of adhesion the cells were processed for immunofluorescence staining of talin (A,B) or paxillin (C,D). The specimen were observed with a  $\times 100$  objective under oil immersion. Bar, 5  $\mu\text{m}$ .

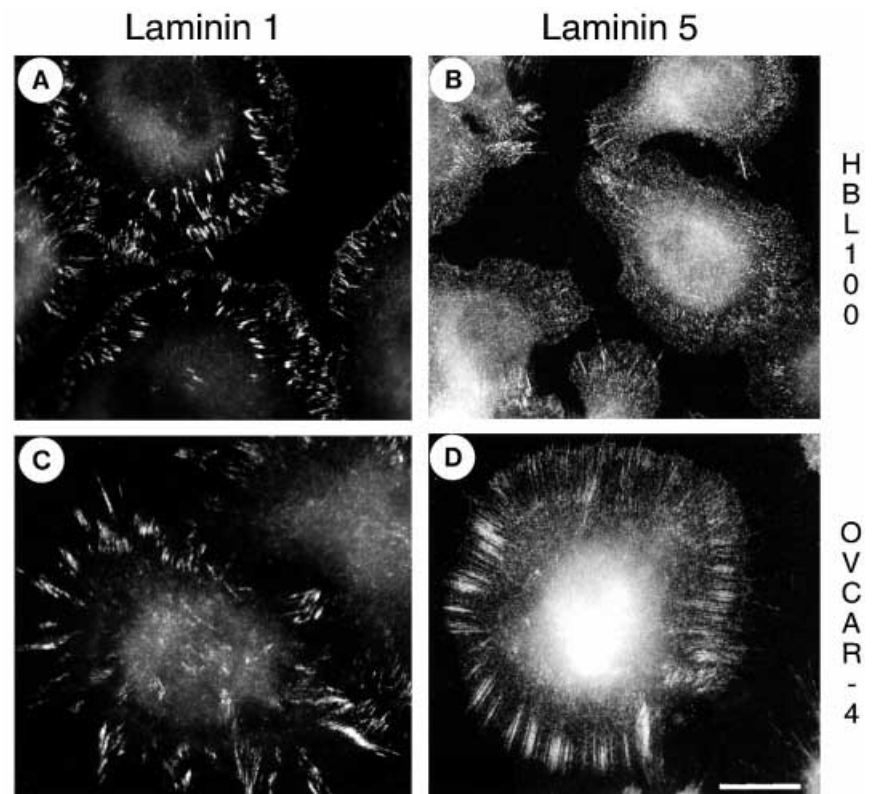

**Fig. 4.** Indirect immunofluorescence labeling of vinculin in OVCAR-4 and HBL100 cells adhering to laminin 1 or 5. Glass coverslips were coated with laminin 1 (A,C) or 5 (B,D). After 60 minutes of adhesion to laminin coats, adherent HBL100 (A,B) or OVCAR-4 (C,D) cells were incubated with mAb against vinculin followed by Cy3-conjugated second antibody (C,D). The specimens were observed with a  $\times 100$  objective under oil immersion. Bar, 5  $\mu\text{m}$ .

sites on the short arms of laminin 1 could modulate the morphology of focal adhesion. To test these hypotheses normal human skin fibroblasts, OVCAR-4, or HBL100 cells were

seeded on laminin 1 coats in the presence of mAb P1B5, a function-blocking antibody against the  $\alpha 3$  integrin subunit. Under these conditions cell adhesion was not affected but the

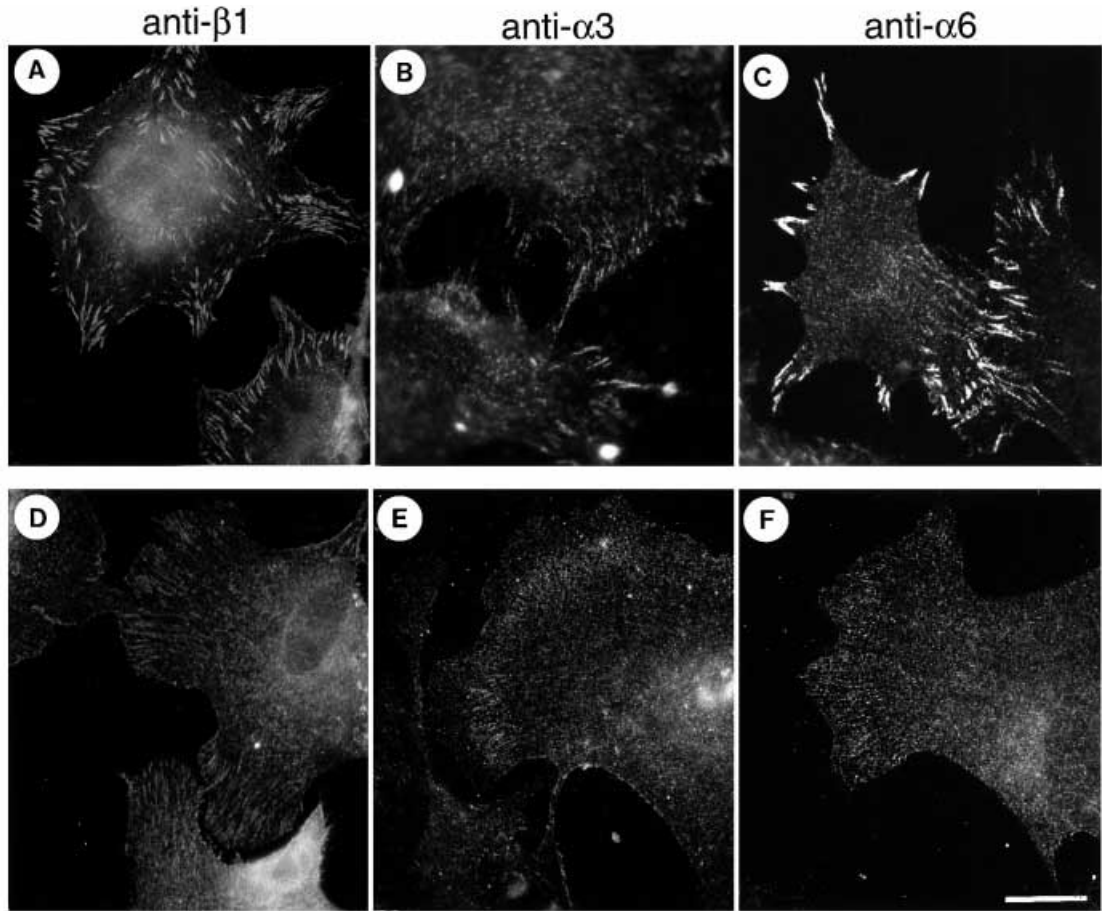

**Fig. 5.** Indirect immunofluorescence staining of integrin subunits in human skin fibroblasts after adhesion to laminin 1 or 5. After adhesion to glass coverslips coated with laminin 1 (A-C) or 5 (D-F), fibroblasts were incubated with mAbs against  $\beta 1$  (K20; A,D),  $\alpha 3$  (P1B5; B,E), or  $\alpha 6$  (GoH3; C,F) integrin subunit, followed by the appropriate Cy3-conjugated second antibody. In all cases fibrillar actin was visualized by fluorescein-phalloidin (not shown). Bar, 5  $\mu\text{m}$ .

**Fig. 6.** Inhibition of fibroblast adhesion to laminin 1 or 5 by function-blocking anti-integrin antibodies. Multiwell plates were coated with an optimal concentration of laminin 1 or 5 and post-coated with 1% bovine serum albumin. Fibroblasts were seeded in the presence of serial 1:2 dilutions of mAbs directed against integrin subunits as indicated on the figure. The highest concentration used were as follows: P4C10 at 1:500 (anti- $\beta 1$ ); P1B5 at 1:200 (anti- $\alpha 3$ ); GoH3 at 1:10 (anti- $\alpha 6$ ). Filled symbols indicate adhesion in the presence of the combination P1B5 at 1:200 and GoH3 at 1:10. Cell adhesion was measured after 30 minutes using a colorimetric reaction as described in Materials and Methods. Each point represents the average of triplicate wells. Adhesion in the absence of antibodies was set as 100% and values reported on the graph express the percentage of adherent cells in the presence of antibodies.

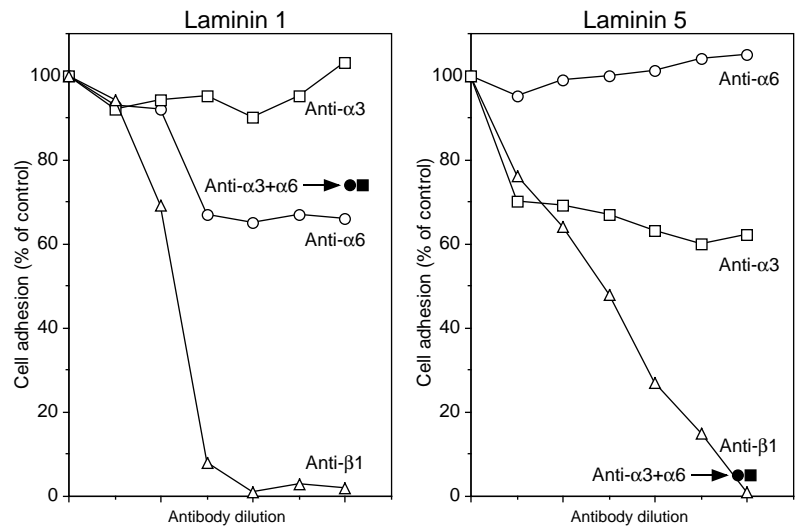

fibroblasts developed lamellipodia and immunofluorescence labelings of vinculin (shown for normal human skin fibroblasts, Fig. 7B) or  $\alpha 6$  integrin subunit (shown for OVCAR-4 and HBL100 cells, Fig. 8) were distinctly altered and were similar to that observed for cells plated onto laminin 5 (compare Figs 2 and 7 for normal human skin fibroblasts and Figs 4 and 8 for OVCAR-4 and HBL100 cells). In control experiments replacement of mAb P1B5 by mAb P1E6, a

function-blocking antibody against the  $\alpha 2$  integrin subunit, did not alter the morphology of focal adhesion structures (Fig. 7F). Furthermore, when fibroblasts were seeded on fragment E8 (a proteolytically derived fragment of laminin 1), the major cell binding site and the ligand of the  $\alpha 6\beta 1$  integrin, in the absence or presence of mAb P1B5 (Fig. 7), vinculin labeling was identical to that observed on laminin 1 under the same conditions (Fig. 7; compare A to C and B to D). By contrast,

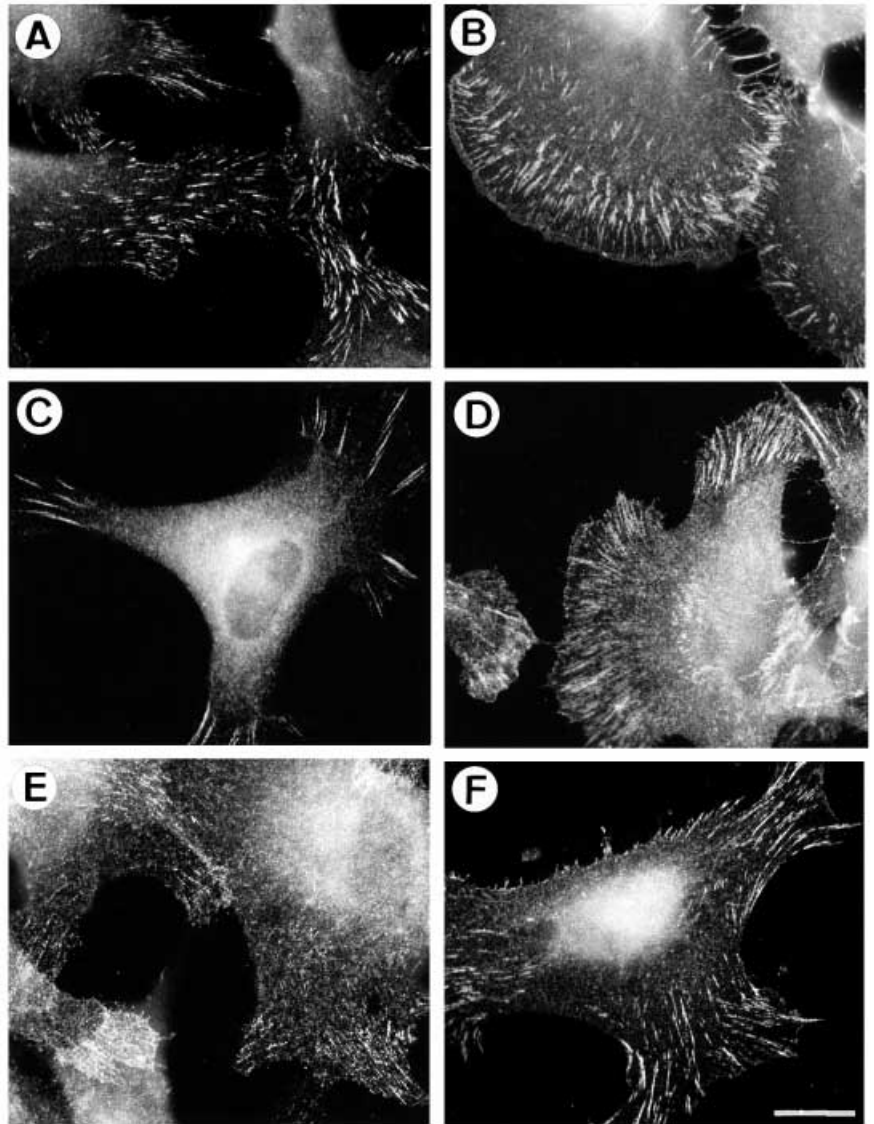

**Fig. 7.** Indirect immunofluorescence staining of focal adhesions formed by fibroblasts adherent to laminin 1 or to fragment E8 in absence or in presence of antibodies against  $\alpha 2$  or  $\alpha 3$  integrin subunits. Fibroblasts were seeded on glass coverslips coated with laminin 1 (A,B,E,F) or fragment E8 (C,D), in the absence (A,C,E), or presence of antibodies against  $\alpha 3$  (B,D) or  $\alpha 2$  (F) integrin subunits. After adhesion the cells were processed for immunofluorescence visualization of vinculin (A-E) or  $\alpha 2$  integrin subunit (F). Specimens were observed under oil immersion. Bar, 5  $\mu\text{m}$ .

antibody occupancy of  $\alpha 3\beta 1$  integrins on cells seeded on collagen IV or fibronectin did not modify the focal adhesions formed on these substrates (not shown). Finally, labeling of the  $\alpha 2$  integrin subunit in fibroblasts adherent to laminin 1 (Fig. 7) indicated a clustering different from that observed when the major laminin 1 receptor  $\alpha 6\beta 1$  integrin was involved. As a positive control, fibroblasts seeded on collagen IV coats were processed in parallel for indirect immunofluorescence staining of  $\alpha 2$  integrin subunit (not shown). Observation of the specimen revealed that on collagen IV, in contrast to laminin 1,  $\alpha 2$  integrins were clustered in large patchy focal adhesions as previously reported (Mercier et al., 1996).

## DISCUSSION

We have investigated focal adhesions formed by cells on laminin 1 and laminin 5 isoforms. Both induced a comparable concentration-dependent adhesion of normal human skin fibroblasts. This confirms and extends previous work showing

that laminin 5 is a very potent adhesion substrate for a wide range of normal, transfected, or neoplastic cells (Carter et al., 1991; Wayner et al., 1993; Rousselle and Aumailley, 1994; Delwel et al., 1994).

Using different types of cells, including lines transfected with specific integrin cDNAs, two integrins,  $\alpha 3\beta 1$  and  $\alpha 6\beta 1$ , were found to participate in cell adhesion to laminin 5 (Carter et al., 1991; Rousselle and Aumailley, 1994; Delwel et al., 1994). Based on inhibition experiments with function-blocking anti-integrin antibodies, the contribution of  $\alpha 3\beta 1$  integrins to the cellular interactions with laminin 5 was found to be more significant than that of  $\alpha 6\beta 1$  integrins. Indeed, adhesion to laminin 5 was not affected by antibodies against  $\alpha 6$  integrin subunit used alone, and was completely or partially inhibited by antibodies against  $\alpha 3$  integrin subunit in, respectively, OVCAR-4 or HBL100 cells (Rousselle and Aumailley, 1994), which express both  $\alpha 3\beta 1$  and  $\alpha 6\beta 1$  integrins (Sonnenberg et al., 1990). In this report, similar cell adhesion inhibition assays were performed with normal human skin fibroblasts. The results showed that  $\alpha 6\beta 1$  integrins, but not  $\alpha 3\beta 1$ , mediated

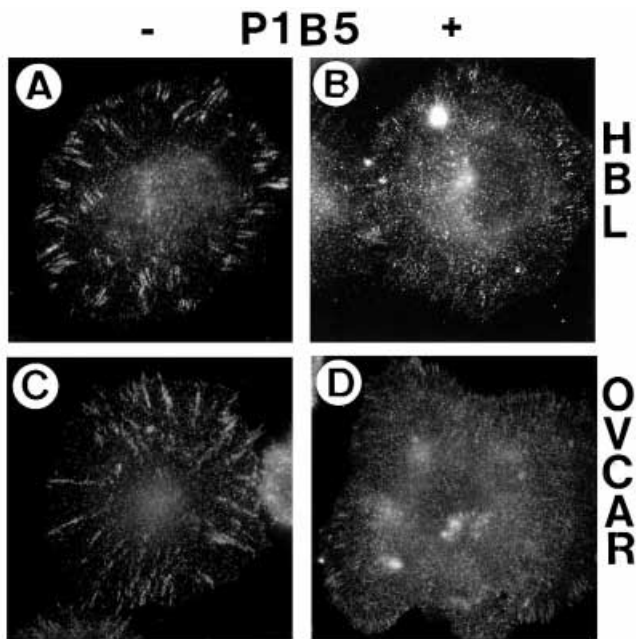

**Fig. 8.** Antibody occupancy of  $\alpha 3\beta 1$  integrins affect  $\alpha 6\beta 1$  integrin clustering on laminin 1. OVCAR-4 or HBL100 cells were plated on laminin 1 coats in the absence (A,C) or presence (B,D) of mAb P1B5 (1:400) against the  $\alpha 3$  integrin subunit. After 60 minutes of incubation, adherent cells were fixed and processed for indirect immunofluorescence staining of  $\alpha 6$  integrin subunit. Bar, 5  $\mu$ m.

fibroblast adhesion to laminin 1, while both integrins were involved in the adhesion of fibroblasts to laminin 5 (Fig. 6). This agrees with previous results obtained by inhibition assays of other type of cells (Sonnenberg et al., 1990; Rousselle and Aumailley, 1994) and with affinity chromatography experiments showing binding of  $\alpha 6\beta 1$  integrins, but not  $\alpha 3\beta 1$ , to laminin 1 (Sonnenberg et al., 1991). Together these results show that the  $\alpha 3\beta 1$  and  $\alpha 6\beta 1$  integrins have isoform-specific affinity.

Both laminin substrates induced a distinct spreading of the cells and a similar organization of fibrillar actin as shown by staining with fluorescein-conjugated phalloidin. The overall cell shapes adopted on laminin 1 or 5 were, however, different. In particular, cell contours were smoother on laminin 5, with numerous lamellipodia, whereas filopodia-like structures developed on laminin 1. In addition, vinculin, a marker of mature focal contacts (Burrige et al., 1988), appeared differently organized. For cells adhering to laminin 1, or to its proteolytically derived fragment E8, indirect immunofluorescence labeling of vinculin showed that it was clustered into short and thick patches localized at the termini of actin stress fibers as described for cells on fibronectin or collagens (Fath et al., 1989; Woods and Couchman, 1992; Mercier et al., 1996). By contrast, in cells adhering to laminin 5, antibodies against cytoskeletal linker proteins decorated thin, punctuate structures extending long distances along the actin microfilaments running longitudinally across the cells. The  $\beta 1$  integrin subunits too were clustered into focal adhesions in similar patterns as for cytoskeletal linker molecules on the different laminin isoforms. This could reflect different organisation of the supramolecular complexes formed

at the focal contacts by integrin cytoplasmic domains and cytoskeletal linker proteins. Similar observations were made for the  $\alpha 6$  integrin subunit, indicating that, besides mediating the interactions with both ligands, it also participates in the formation of focal adhesions. Interestingly, indirect immunofluorescence staining of the  $\alpha 2$  integrin subunit revealed that it segregated to adhesion structures differing from those containing the  $\alpha 6$  integrin subunits. The  $\alpha 2\beta 1$  integrin is a classical collagen receptor which can also interact with the short arms of laminin 1, however, with low affinity (Languino et al., 1989; Pfaff et al., 1994). This may explain the difference seen between staining of  $\alpha 2$  or  $\alpha 6$  integrin subunits.

In contrast, although staining of the  $\alpha 3$  integrin subunit revealed that it was recruited along the actin microfilaments in cells adhering to laminin 5, this integrin did not occur in the focal adhesions formed by cells adhering to laminin 1, in agreement with previous work showing no direct binding of  $\alpha 3\beta 1$  integrin to laminin 1 (Sonnenberg et al., 1991; Delwel et al., 1994; Rousselle and Aumailley, 1994). Moreover, occupancy of  $\alpha 3\beta 1$  integrins with an  $\alpha 3$ -directed function-blocking antibody, resulted in a major change in the clustering of vinculin or  $\alpha 6$  integrin subunits in cells adhering to laminin 1 or fragment E8. Alteration of focal adhesion morphology by antibody occupancy of  $\alpha 3\beta 1$  integrins was specific for laminin 1 and not observed in cells adherent to collagen IV or fibronectin. These results indicate that the nature of the integrin  $\alpha$  subunits clustered into the adhesion structures affects the supramolecular organization of integrin subunits and cytoskeletal linker proteins. In particular, clustering of  $\alpha 6\beta 1$  integrins, other focal adhesion-associated components, and  $\alpha 3\beta 1$  integrins itself are dependent on occupancy of the later by its natural ligand, laminin 5, or by a specific antibody. This observation may explain conflicting reports on the presence of  $\alpha 3$  integrin subunits in focal adhesions. Indeed, the presence of  $\alpha 3$  integrin subunits in adhesion structures has been observed in only some cell types such as keratinocytes (Carter et al., 1990) or kidney mesangial cells (Grenz et al., 1993), but not in many others, including fibroblasts (Carter et al., 1991; Elices et al., 1991), which may, respectively, have or not have  $\alpha 3\beta 1$  integrin ligands in their matrix.

Furthermore, occupancy of  $\alpha 3\beta 1$  integrins specifically affects  $\alpha 6\beta 1$  integrins and not the integrins involved in cell adhesion to collagen IV or fibronectin. Although the functional role of the intracellular domains of  $\alpha$  integrin subunits is still elusive it has been suggested that they regulate integrin clustering by preventing indiscriminate recruitment of the subunits, presumably by hampering  $\beta$  tail interactions with cytoskeletal components (Briesewitz et al., 1993; Weitzman et al., 1997). Along the same lines, it has been shown that detection of  $\alpha 3$  integrin subunit into focal contacts is favored by chemical cross-linking of the integrin to the extracellular matrix followed by extraction of cytoskeletal components (DiPersio et al., 1995) and the authors proposed the hypothesis that the  $\alpha 3$  integrin subunit may be masked by interacting with focal adhesion components. Our data indicate that, when ligated to its natural ligand,  $\alpha 3\beta 1$  integrins are integrated into focal adhesions in such a state that not only renders these integrins available for immunological detection but also, and most importantly, allows for a direct or indirect regulation of the clustering of  $\alpha 6\beta 1$  integrins and of focal adhesion-associated components. It has been recently postulated that



$\alpha$ IIb $\beta$ 3 integrins inhibit the function of both  $\alpha$ 2 $\beta$ 1 and  $\alpha$ 5 $\beta$ 1 integrins by a trans-dominant mechanism (Diaz-Gonzalez et al., 1996). Here we have provided the first evidence for a cross-talk between  $\alpha$ 3 $\beta$ 1 and  $\alpha$ 6 $\beta$ 1 integrins when both are ligated, a process which is likely due to a trans-dominant regulation of  $\alpha$ 6 $\beta$ 1 by  $\alpha$ 3 $\beta$ 1 integrins.

The formation of adhesion complexes is crucial for signal delivery from the extracellular matrix to the cell interior and for the inside-out transfer of information (Burrige et al., 1988; Juliano and Haskill, 1993; Sastry and Horwitz, 1993; Clark and Brugge, 1995). A different ultrastructural arrangement of the molecules within the adhesion complexes could be linked to the transmission of distinct signals. Cells can develop morphologically different cell adhesion structures, such as focal contacts (Burrige et al., 1988; Woods and Couchman, 1992), podosomes (Tarone et al., 1985), or point contacts (Tawil et al., 1993) which differ in molecular composition. Here we described two morphologically different types of focal adhesions, which are laminin isoform-specific. At a molecular level they both contain vinculin, talin, paxillin,  $\alpha$ 6 and  $\beta$ 1 integrin subunits, but differ by the presence of  $\alpha$ 3 integrin subunit, and they are related to a different cell shape, i.e. the presence of filopodia or lamellipodia. The reorganization of the actin cytoskeleton is under the control of many factors, including small GTP-binding proteins of the Rho family (Hall, 1994). In particular, Rac or Cdc42 have been shown to regulate the formation of, respectively, lamellipodia or filopodia (Machesky and Hall, 1996). Occupancy of the integrin  $\alpha$ 3 $\beta$ 1 by laminin 5 could possibly trigger one of the small GTP-binding proteins which would explain the difference in cell morphology that we have observed, but further studies are required to support this hypothesis.

In conclusion, by interacting with different integrins, laminin 1 and 5 have the property to induce isoform specific focal adhesions. Since expression of laminin chains varies with time and developmental stage, the presence of a given laminin isoform may provide tissue-specific signals to the resident cells.

We thank Drs M. Glukhova, K. Kühn, A. Sonnenberg, R. Timpl, and C. Turner for kind gift of reagents, J. Pradines-Grillet for expert technical assistance, A. Bosch for artwork, Dr N. Smyth for critical reading of the manuscript, and Dr M. Paulsson for valuable suggestions. D. Dogic was supported by a fellowship from Centre National des Oeuvres Universitaires et Scolaires. The major part of this work was supported by the Centre National de la Recherche Scientifique and grants of the Association pour la Recherche sur le Cancer to M.A. and to P.R. At a later stage this work was supported by the University of Cologne and the Deutsche Forschungsgemeinschaft.

## REFERENCES

- Aumailley, M., Krieg, T., Razaka, G., Müller, P. K. and Bricaud, H. (1982). Influence of cell density on collagen biosynthesis in fibroblast cultures. *Biochem. J.* **206**, 505-510.
- Aumailley, M., Mann, K., von der Mark, H. and Timpl, R. (1989). Cell attachment properties of collagen VI and Arg-Gly-Asp dependent binding to its  $\alpha$ 2(VI) and  $\alpha$ 3(VI) chains. *Exp. Cell Res.* **181**, 463-474.
- Aumailley, M. and Krieg, T. (1996). Laminins: a family of diverse multifunctional molecules of basement membranes. *J. Invest. Dermatol.* **106**, 209-214.
- Aumailley, M., Gimond, C. and Rousselle, P. (1996). Integrin-mediated cellular interactions with laminins. In *The Laminins* (ed. P. Ekblom and R. Timpl), pp. 127-158. Harwood Academic Publishers.
- Briesewitz, R., Kern, A. and Marcantonio, E. E. (1993). Ligand-dependent and -independent integrin focal contact localization: the role of the  $\alpha$  chain cytoplasmic domain. *Mol. Biol. Cell* **4**, 593-604.
- Brown, J. C., Wiedemann, H. and Timpl, R. (1994). Protein binding and cell adhesion properties of two laminin isoforms (AmB1eB2e, AmB1sB2e) from human placenta. *J. Cell Sci.* **107**, 329-338.
- Burgeson, R. E., Chiquet, M., Deutzmann, R., Ekblom, P., Engel, J., Kleinman, H. K., Martin, G. R., Meneguzzi, G., Paulsson, M., Sanes, J., Timpl, R., Tryggvason, K., Yamada, Y. and Yurchenco, P. D. (1994). A new nomenclature for laminins. *Matrix Biol.* **14**, 209-211.
- Burrige, K., Fath, K., Kelly, T., Nuckolls, G. and Turner, C. (1988). Focal adhesions: transmembrane junctions between the extracellular matrix and the cytoskeleton. *Annu. Rev. Cell Biol.* **4**, 487-525.
- Carter, W. G., Kaur, P., Gil, S. G., Gahr, P. J. and Wayner, E. A. (1990). Distinct functions for integrins  $\alpha$ 3 $\beta$ 1 in focal adhesions and  $\alpha$ 6 $\beta$ 4/bullous pemphigoid antigen in a new stable anchoring contact (SAC) of keratinocytes: relation to hemidesmosomes. *J. Cell Biol.* **111**, 3141-3154.
- Carter, W. G., Ryan, M. C. and Gahr, P. J. (1991). Epiligrin, a new cell adhesion ligand for integrin  $\alpha$ 3 $\beta$ 1 in epithelial basement membranes. *Cell* **65**, 599-610.
- Clark, E. A. and Brugge, J. S. (1995). Integrins and signal transduction pathways: the road taken. *Science* **268**, 233-238.
- Colognato-Pyke, H., O'Rear, J. J., Yamada, Y., Carbonetto, S., Cheng, Y.-S. and Yurchenco, P. D. (1995). Mapping of network-forming, heparin-binding, and  $\alpha$ 1 $\beta$ 1 integrin-recognition sites within the  $\alpha$ -chain short arm of laminin-1. *J. Biol. Chem.* **270**, 9398-9406.
- Delwel, G. O., Hogervorst, F., Kuikman, I., Paulsson, M., Timpl, R. and Sonnenberg, A. (1993). Expression and function of the cytoplasmic variants of the integrin  $\alpha$ 6 subunit in transfected K562 cells. Activation-dependent adhesion and interaction with isoforms of laminin. *J. Biol. Chem.* **268**, 25865-25875.
- Delwel, G. O., de Melker, A. A., Hogervorst, F., Jaspars, L. H., Fles, D. L. A., Kuikman, I., Lindblom, A., Paulsson, M., Timpl, R. and Sonnenberg, A. (1994). Distinct and overlapping ligand specificities of the  $\alpha$ 3A $\beta$ 1 and  $\alpha$ 6A $\beta$ 1 integrins: recognition of laminin isoforms. *Mol. Biol. Cell* **5**, 203-215.
- Deutzmann, R., Aumailley, M., Wiedemann, H., Pysny, W., Timpl, R. and Edgar, D. (1990). Cell adhesion, spreading and neurite stimulation by laminin fragment E8 depends on maintenance of secondary and tertiary structure in its rod and globular domain. *Eur. J. Biochem.* **191**, 513-522.
- Diaz-Gonzalez, F., Forsyth, J., Steiner, B. and Ginsberg, M. H. (1996). Trans-dominant inhibition of integrin function. *Mol. Biol. Cell* **7**, 1939-1951.
- DiPersio, C. M., Shah, S. and Hynes, R. O. (1995).  $\alpha$ 3A $\beta$ 1 integrin localizes to focal contacts in response to diverse extracellular matrix proteins. *J. Cell Sci.* **108**, 2321-2326.
- Dowling, J., Yu, Q. C. and Fuchs, E. (1996).  $\beta$ 4 integrin is required for hemidesmosome formation, cell adhesion and cell survival. *J. Cell Biol.* **134**, 559-572.
- Ekblom, M., Klein, G., Mugrauer, G., Fecker, L., Deutzmann, R., Timpl, R. and Ekblom, P. (1990). Transient and locally restricted expression of laminin A chain mRNA by developing epithelial cells during kidney organogenesis. *Cell* **60**, 337-346.
- Elices, M. J., Urry, L. A. and Hemler M. E. (1991). Receptor functions for the integrin VLA-3: fibronectin, collagen, and laminin binding are differentially influenced by ARG-GLY-ASP peptide and by divalent cations. *J. Cell Biol.* **112**, 169-181.
- Fath, L. R., Edgell, C.-J. and Burrige, K. (1989). The distribution of distinct integrins in focal contacts is determined by the substratum composition. *J. Cell Sci.* **92**, 67-75.
- Forsberg, E., Lindblom, A., Paulsson, M. and Johansson, S. (1994). Laminin isoforms promote attachment of hepatocytes via different integrins. *Exp. Cell Res.* **215**, 33-39.
- Goodman, S. L., Deutzmann, R. and von der Mark, K. (1987). Two distinct cell-binding domains in laminin can independently promote nonneuronal cell adhesion and spreading. *J. Cell Biol.* **105**, 589-598.
- Goodman, S. L., Aumailley, M. and von der Mark, H. (1991). Multiple cell surface receptors for the short arms of laminin:  $\alpha$ 1 $\beta$ 1 integrin and RGD-dependent proteins mediate cell attachment only to domains III in murine tumor laminin. *J. Cell Biol.* **113**, 931-941.
- Grenz, H., Carbonetto, S. and Goodman, S. L. (1993).  $\alpha$ 3 $\beta$ 1 integrin is

- moved into focal contacts in kidney mesangial cells. *J. Cell Sci.* **105**, 739-751.
- Hall, A.** (1994). Small GTP-binding proteins and the regulation of the actin cytoskeleton. *Annu. Rev. Cell Biol.* **10**, 31-54.
- Hall, D. E., Reichardt, L. F., Crowley, E., Holley, B., Moezzi, H., Sonnenberg, A. and Damsky, C.H.** (1990). The  $\alpha 1/\beta 1$  and  $\alpha 6/\beta 1$  integrin heterodimers mediate cell attachment to distinct sites on laminin. *J. Cell Biol.* **110**, 2175-2184.
- Henry, M. D. and Campbell, K. P.** (1996). Dystroglycan: an extracellular matrix receptor linked to the cytoskeleton. *Curr. Opin. Cell Biol.* **8**, 625-631.
- Hynes, R. O.** (1992). Integrins: versatility, modulation, and signaling in cell adhesion. *Cell* **69**, 11-25.
- Juliano, R. L. and Haskill, S.** (1993). Signal transduction from the extracellular matrix. *J. Cell Biol.* **120**, 577-585.
- Kramer, R. H., Vu, M. P., Cheng, Y.-F., Ramos, D. M., Timpl, R. and Waleh, N.** (1991). Laminin-binding integrin  $\alpha 7\beta 1$ : functional characterization and expression in normal and malignant melanocytes. *Cell Regul.* **2**, 805-817.
- Languino, L. R., Gehlsen, K. R., Wayner, E. A., Carter, W. G., Engvall, E. and Ruoslahti, E.** (1989). Endothelial cells use  $\alpha 2\beta 1$  integrin as a laminin receptor. *J. Cell Biol.* **109**, 2455-2462.
- Lentz, S. I., Miner, J. H., Sanes, S. R. and Snider, W. D.** (1997). Distribution of the ten known laminin chains in the pathways and targets of developing sensory axons. *J. Comp. Neurol.* **378**, 547-561.
- Luna, E. J. and Hitt, A. L.** (1992). Cytoskeleton-plasma membrane interactions. *Science* **258**, 955-964.
- Machesky, L. and Hall, A.** (1996). Rho: a connection between membrane receptor signalling and the cytoskeleton. *Trends Cell Biol.* **6**, 304-310.
- Mercier, I., Lechaire, J.-P., Desmoulière, A., Gaill, F. and Aumailley, M.** (1996). Interactions of human skin fibroblasts with monomeric or fibrillar collagens induce different organization of the cytoskeleton. *Exp. Cell Res.* **225**, 245-256.
- Miner, J. H., Patton, B. L., Lentz, S. I., Gilbert, D. J., Snider, W. D., Jenkins, N. A., Copeland, N. G. and Sanes, J. R.** (1997). The laminin  $\alpha$  chains: expression, developmental transitions, and chromosomal locations of  $\alpha 1-5$ , identification of heterotrimeric laminins 8-11, and cloning of a novel  $\alpha 3$  isoform. *J. Cell Biol.* **137**, 685-701.
- Niessen, C. M., van der Raaij-Helmer, M. H., Hulsman, E. H., van der Neut, R., Jonkman, M. F. and Sonnenberg, A.** (1996). Deficiency of the integrin  $\beta 4$  subunit in junctional epidermolysis bullosa with pyloric atresia: consequences for hemidesmosome formation and adhesion properties. *J. Cell Sci.* **109**, 1695-1706.
- Paulsson, M., Aumailley, M., Deutzmann, R., Timpl, R., Beck, K. and Engel, J.** (1987). Laminin-nidogen complex. Extraction with chelating agents and structural characterization. *Eur. J. Biochem.* **166**, 11-19.
- Pfaff, M., Göhring, W., Brown, J. and Timpl, R.** (1994). Binding of purified collagen receptors ( $\alpha 1\beta 1$ ,  $\alpha 2\beta 1$ ) and RGD-dependent integrins to laminins and laminin fragments. *Eur. J. Biochem.* **225**, 975-984.
- Rousselle, P. and Aumailley, M.** (1994). Kalinin is more efficient than laminin in promoting adhesion of primary keratinocytes and some other epithelial cells and has a different requirement for integrin receptors. *J. Cell Biol.* **125**, 205-214.
- Rousselle, P., Golbik, R., van der Rest, M. and Aumailley, M.** (1995). Structural requirement for cell adhesion to kalinin (laminin 5). *J. Biol. Chem.* **270**, 13766-13770.
- Rousselle, P., Lunstrum, G. P., Keene, D. R. and Burgeson, R. E.** (1991). Kalinin: an epithelium-specific basement membrane adhesion molecule that is a component of anchoring filaments. *J. Cell Biol.* **114**, 567-576.
- Sastry, S. and Horwitz, A. F.** (1993). Integrin cytoplasmic domains: mediators of cytoskeletal linkages and extra- and intracellular initiated transmembrane signaling. *Curr. Opin. Cell Biol.* **5**, 819-831.
- Sonnenberg, A., Linders, C. J. T., Modderman, P. W., Damsky, C. H., Aumailley, M. and Timpl, R.** (1990a). Integrin recognition of different cell-binding fragments of laminin (P1, E3, E8) and evidence that  $\alpha 6\beta 1$  but not  $\alpha 6\beta 4$  functions as a major receptor for fragment E8. *J. Cell Biol.* **110**, 2145-2155.
- Sonnenberg, A., Linders, C. J. T., Daams, J. H. and Kennel, S. J.** (1990b). The  $\alpha 6\beta 1$  (VLA-6) and  $\alpha 6\beta 4$  protein complexes: tissue distribution and biochemical properties. *J. Cell Sci.* **96**, 207-217.
- Sonnenberg, A., Gehlsen, K., Aumailley, M. and Timpl, R.** (1991). Isolation of  $\alpha 6\beta 1$  integrins from platelets and adherent cells by affinity chromatography on mouse laminin fragment E8 and human laminin pepsin fragment. *Exp. Cell Res.* **197**, 234-244.
- Tarone, G., Cirillo, D., Giancotti, P. G., Comoglio, G. M. and Marchisio, P. C.** (1985). Rous sarcoma virus-transformed fibroblasts adhere primarily to discrete protrusions of the ventral membrane called podosomes. *Exp. Cell Res.* **159**, 141-157.
- Tawil, N., Wilson, P. and Carbonetto, S.** (1993). Integrins in point contacts mediate cell spreading: factors that regulate integrin accumulation in point contacts vs. focal contacts. *J. Cell Biol.* **120**, 261-271.
- Tiger, C. F., Champlaud, M.-F., Pedrosa-Domello, F., Thornell, L. E., Ekblom, P. and Gullberg, D.** (1997). Presence of laminin  $\alpha 5$  chain and lack of laminin  $\alpha 1$  chain during human muscle development and in muscular dystrophies. *J. Biol. Chem.* **272**, 28590-28595.
- Timpl, R. and Brown, J. C.** (1994). The laminins. *Matrix Biol.* **14**, 275-281.
- van der Neut, R., Krimpenfort, P., Calafat, J., Niessen, C. M. and Sonnenberg, A.** (1996). Epithelial detachment due to absence of hemidesmosomes in integrin  $\beta 4$  null mice. *Nat. Genet.* **13**, 366-369.
- Vidal, F., Aberdam, D., Miquel, C., Christiano, A. M., Pulkkinen, L., Uitto, J., Ortonne, J. P. and Meneguzzi, G.** (1995). Integrin  $\beta 4$  mutations associated with junctional epidermolysis bullosa with pyloric atresia. *Nature Genet.* **10**, 229-234.
- Wayner, E. A., Gil, S. G., Murphy, G. F., Wilke, M. S. and Carter, W. G.** (1993). Epiligrin, a component of epithelial basement membranes, is an adhesive ligand for  $\alpha 3\beta 1$  positive T lymphocytes. *J. Cell Biol.* **121**, 1141-1152.
- von der Mark, H., Dürr, J., Sonnenberg, A., von der Mark, K., Deutzmann, R. and Goodman, S. L.** (1991). Skeletal myoblasts utilize a novel  $\beta 1$  series integrin and not  $\alpha 6\beta 1$  for binding to the E8 and T8 fragments of laminin. *J. Biol. Chem.* **266**, 23593-23601.
- Weitzman, J. B., Pujades, C. and Hemler, M. E.** (1997). Integrin  $\alpha$  chain cytoplasmic tails regulate 'antibody-redirected' cell adhesion, independently of ligand binding. *Eur. J. Immunol.* **27**, 78-84.
- Woods, A. and Couchman, J. R.** (1992). Protein kinase C involvement in focal adhesion formation. *J. Cell Sci.* **101**, 277-290.
